# Supplementary material
Source: publisher figshare collection journal article supplement (https://karger.figshare.com/articles/dataset/_/9712004)
Supplement: Supplementary file 2 [file 1]

Archive with 3 entries (3 files):
- CMG_201812001_2_10_Appendix_B.pdf
- CMG_201812001_2_11_Appendix_C.pdf
- CMG_201812001_2_9_Appendix_A.pdf
