# Supplementary material
Source: publisher figshare collection journal article supplement (https://karger.figshare.com/articles/dataset/_/9712004)
Supplement: Supplementary file 2 [file 1 › CMG_201812001_2_11_Appendix_C.pdf]

## Appendix C: Psychosocial Variable Correlations

Appendix D: Psychosocial Variable Correlations

|                                    | Perc. Risk<br>Abs. - 7 | Perc. Risk<br>Abs. - 2 | Perc. Risk<br>Com. - 5 | Resp.<br>Efficacy | SE: Capa-<br>bility | SE: Confi-<br>dence | Family<br>Influence | HSD     | Cancer<br>Fatalism | Miscon-<br>ceptions |
|------------------------------------|------------------------|------------------------|------------------------|-------------------|---------------------|---------------------|---------------------|---------|--------------------|---------------------|
| Perceived Risk<br>(Abs. - 7-level) | -                      | 0.63***                | 0.57***                | 0.15**            | 0.22*               | 0.11*               | -0.02               | -0.01   | -0.05              | -0.08               |
| Perceived Risk<br>(Abs. - 2-level) | 0.63***                | -                      | 0.67***                | 0.15**            | 0.15                | 0.09                | -0.02               | 0.01    | -0.04              | -0.09               |
| Perceived Risk<br>(Com. - 5-level) | 0.57***                | 0.67***                | -                      | 0.16**            | 0.24**              | 0.14*               | 0.01                | -0.04   | -0.04              | -0.06               |
| Response<br>Efficacy               | 0.15**                 | 0.15**                 | 0.16**                 | -                 | 0.47***             | 0.52***             | 0.05                | -0.08   | -0.11*             | -0.13**             |
| Self-Efficacy:<br>Capability       | 0.22*                  | 0.15                   | 0.24**                 | 0.47***           | -                   | NA                  | -0.08               | -0.05   | -0.13              | -0.15               |
| Self-Efficacy:<br>Confidence       | 0.11*                  | 0.09                   | 0.14*                  | 0.52***           | NA                  | -                   | 0.05                | -0.08   | -0.11*             | -0.12*              |
| Family<br>Influence on<br>Health   | -0.02                  | -0.02                  | 0.01                   | 0.05              | -0.08               | 0.05                | -                   | -0.14** | 0.05               | 0.13**              |
| Health System<br>Distrust (HSD)    | -0.01                  | 0.01                   | -0.04                  | -0.08             | -0.05               | -0.08               | -0.14**             | -       | 0.00               | -0.01               |
| Cancer<br>Fatalism                 | -0.05                  | -0.04                  | -0.04                  | -0.11*            | -0.13               | -0.11*              | 0.05                | 0.00    | -                  | 0.29***             |
| Skin cancer<br>misconceptions      | -0.08                  | -0.09                  | -0.06                  | -0.13**           | -0.15               | -0.12*              | 0.13**              | -0.01   | 0.29***            | -                   |
| Health Literacy                    | 0.04                   | 0.03                   | 0.10*                  | 0.11*             | 0.23**              | 0.05                | -0.18***            | -0.05   | -0.18***           | -0.29***            |
